# Supplementary material for: Two-Year Follow-Up Study of Patients with Neovascular Age-Related Macular Degeneration Undergoing Anti-VEGF Treatment during the COVID-19 Pandemic
Source: MDPI journal article supplement (doi:10.3390/jcm13030867), 2024-02-01
Supplement: s1 [file s1]

**Table S1.** Inclusion and exclusion criteria

| <b>Inclusion criteria</b>                                                                               | <b>Exclusion criteria</b>                                                                                               |
|---------------------------------------------------------------------------------------------------------|-------------------------------------------------------------------------------------------------------------------------|
| nAMD patient aged $\geq 50$ years                                                                       | AMD with a disciform scar or geographic atrophy                                                                         |
| Completed three initial monthly intravitreal anti-VEGF injections                                       | Did not need intravitreal anti-VEGF injection due to lack of disease activity                                           |
| At least one delayed intravitreal anti-VEGF injection between February and June 2020                    | Higher myopia more than 4 D                                                                                             |
| $\geq 2$ weeks delayed for scheduled injection date between February 2020 and June 2020 (Delayed group) | Diseases that could affect anatomical structure of the retina (e.g. diabetic retinopathy, retinal vein occlusion, etc.) |
| Delayed more than weeks corresponding to the average month of follow-up (Delayed group)                 | History of intraocular surgery except for cataract surgery                                                              |
| Visited on the appointment date (On-time group)                                                         | Follow-up loss or delayed during study period                                                                           |

nAMD, neovascular age-related macular degeneration; VEGF, vascular endothelial growth factor; D, diopters.

**Table S2.** Longer post-pandemic injection interval and being men were the risk factors for worsened BCVA and OCT parameters at 2 years post-pandemic

|                                                           | BCVA   |                 | CST    |                 | Maximum SRF height |                 |
|-----------------------------------------------------------|--------|-----------------|--------|-----------------|--------------------|-----------------|
|                                                           | S.E.   | <i>p</i> -Value | S.E.   | <i>p</i> -Value | S.E.               | <i>p</i> -Value |
| Age ( <i>years</i> )                                      | 0.000  | 1.000           | 0.009  | 0.917           | −0.043             | 0.607           |
| Sex (in men, compared to in women)                        | 0.139  | 0.138           | 0.217  | 0.016*          | 0.318              | <0.001*         |
| Previous anti-VEGF injection ( <i>times</i> )             | 0.019  | 0.869           | 0.093  | 0.396           | 0.016              | 0.876           |
| Injection interval before the pandemic ( <i>months</i> )  | −0.004 | 0.974           | 0.177  | 0.141           | 0.053              | 0.644           |
| Injection interval after the pandemic ( <i>months</i> )   | 0.039  | 0.736           | −0.292 | 0.009*          | −0.298             | 0.005*          |
| Interval from diagnosis to the pandemic ( <i>months</i> ) | −0.093 | 0.414           | −0.059 | 0.588           | −0.069             | 0.502           |

BCVA, best-corrected visual acuity; CST, central subfield thickness; SRF, subretinal fluid; VEGF, vascular endothelial growth factor; S.E., standardized beta coefficient  
 \* Statistically significant.

**Table S3.** Men exhibited worsened OCT parameters compared to women during the pandemic period

|                                |       | <b>Baseline</b> | <b>Pandemic</b> | <b><i>p</i>-Value</b> |
|--------------------------------|-------|-----------------|-----------------|-----------------------|
| BCVA ( <i>logMAR</i> )         | Men   | 0.31±0.22       | 0.39±0.25       | 0.900                 |
|                                | Women | 0.33±0.32       | 0.36±0.32       |                       |
| CST ( $\mu m$ )                | Men   | 232.0±63.0      | 257.5±76.8      | 0.005*                |
|                                | Women | 210.5±45.4      | 218.5±58.1      |                       |
| Maximum SRF height ( $\mu m$ ) | Men   | 86.0±90.4       | 130.9±105.5     | 0.017*                |
|                                | Women | 63.3±81.8       | 71.0±86.3       |                       |

Data are reported either as means with standard deviations or as numerical values. BCVA, best-corrected visual acuity; CST, central subfield thickness; SRF, subretinal fluid.

\* Statistically significant (between men and women).
